# Supplementary material for: Technical note: Characterization of a single-beam gradient force aerosol optical tweezer for droplet trapping, phase transitions monitoring, and morphology studies
Source: Copernicus journal article supplement (doi:10.5194/egusphere-2023-2238), 2023-11-10
Supplement: Supplementary file [file egusphere-2023-2238-AC1-supplement.pdf]

## **Reply to comments on “Technical note: Characterization of a single-beam gradient force aerosol optical tweezer for droplet trapping, phase transitions monitoring, and morphology studies” by Xiangyu Pei et al.**

### **Reply to Anonymous Referee #1**

To give an insight into the physicochemical properties of atmospheric aerosols, it is essential to establish effective measurement methods and techniques. However, many techniques currently applied for aerosol measurement cannot acquire information from a single aerosol droplet, such as flow tube and smog chamber, and data acquired from these means are average results of aerosol population, which may omit specific properties of single droplet. In this technical note, the authors presented details of an aerosol optical tweezer-Raman spectroscopy system, and verified its effectiveness in determining characteristics of single aerosol droplet. Generally, I recommend this paper for publication after considering the following comments:

**Response: We truly appreciate the constructive comments by the referee. These comments are very helpful and valuable for improving the quality of our paper. Below we provide a point-by-point response to each comment. The responses are shown in brown and bold fonts, and the added/rewritten parts are presented in blue and bold fonts.**

1. Line 108-109: Humidity in the levitation chamber was maintained by mixing humidified and dry airflow, and the RH results were measured by two sensors at both the inlet and outlet of the chamber. So, I wonder how the authors determined the actual chamber RH, were the final results an average of the two sensors? Since there was a significant difference between the results from the two sensors as shown in Fig.3.

**Response: Thank you for the question. Two RH sensors are used to measure RH at two different positions - the chamber inlet and the chamber outlet. The first RH sensor measures the RH after mixing of dry flow and wet flow, before the mixed flow enters the chamber. The second sensor is closed to the droplet trapping position and measures the RH in the lower part of the chamber. Hence the RH measured by the sensor at the outlet of the lower part is used as the actual chamber RH. We have added the following sentence in line 126 in the modified version of the manuscript:**

**“The RH measured by the sensor at the outlet of the lower part is used as the actual chamber RH, since this sensor is closed to the droplet trapping position and measures the RH in the lower part.”**

2. Line 131-132: During reactivity experiments, the author declared that the replaceable intermediate part was altered from a flat type to a circular barrier type, can the authors give schematic diagrams of these parts?

**Response: Thank you for the comment. The schematic diagrams of the flat type part and the circular barrier type part are shown in Figure S1 (a) and (b), respectively.**

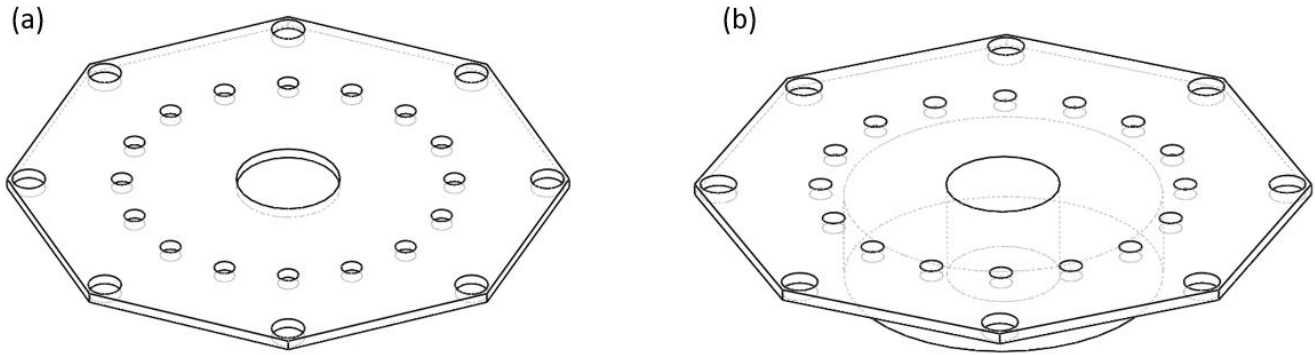

**Figure S1. (a) flat type intermediate part; (b) circular barrier type intermediate part**

3. Line 183: The program was developed by who? The reference was missing.

**Response: Sorry for the missed information. The sentence has been modified:**

**“To address this issue and retrieve the diameters and refractive indices for core-shell droplets, we employ another program called Mie Resonance Shell Fitting (MRSFIT), developed by Vennes and Preston (2019).”**

4. Line 220: The position shift of WGMs from ~30 min to ~200 min in Fig.3(c) was not continuous but discrete, can the authors give some explanations?

**Response: This phenomenon usually occurred when RH increased. When RH increased, position of WGMs did not shift, instead, the intensity of WGMs increased continuously and suddenly the WGMs jumped to a larger position. We speculate that when the droplet was trapped by focused laser, the laser will heat the droplet, resulting in a little higher temperature at both places where the laser penetrated the droplet. When RH increased, the water vapor condensed on the droplet surface where temperature was lower, resulting in an ellipsoid shape instead of a sphere. As a result, the average size of the droplet did not change, so position of WGMs did not**

shift. When more and more water vapor condensed on the droplet, the shape of the droplet became more spherical, resulting in forming a better optical cavity and increasing of intensity of WGMs. After adding some amount of water vapor, the average size of the droplet increased significantly and WGMs jumped to a larger position. When RH decreased, the water vapor leaves the droplet surface gradually, the droplet maintained a spherical shape, so position of WGMs shifted to small values continuously.

5. Line 232-233: How much time was needed for the chamber to reach the set RH?

**Response:** Thank you for the question. In general, the time needed for the chamber to reach the set RH depends on the set RH value. The set RH is higher, the time is longer. For example, from Figure 3(c), we can estimate the time for the chamber to reach the set RH. During the increasing process of RH setting, when RH was changed from 78% to 82%, it took 43 min to reach the set value, whereas when RH was changed from 86% to 90%, it took 73 min to reach the set value. The same phenomenon occurs during the decreasing process of RH setting, when RH was changed from 94% to 90%, it took 63 min to reach the set value; whereas when RH was changed from 82% to 78%, it took 36 min to reach the set value.
